# Supplementary material
Source: publisher figshare collection journal article supplement (https://acs.figshare.com/ndownloader/files/13272668)
Supplement: Supplementary file 1 [file 13272668]

Supporting Information for:

**Sub-Gram-Scale Synthesis of Biomass Waste Derived  
Fluorescent Carbon Dots in Subcritical Water for  
Bioimaging, Sensing and Solid-State Patterning**

Rina Su,<sup>1,2</sup> Dan Wang,<sup>\*,1</sup> Mei Liu,<sup>3</sup> Jia Yan,<sup>3</sup> Jie-Xin Wang,<sup>1,2</sup> Qiuqiang Zhan,<sup>4</sup> Yuan  
Pu,<sup>\*,2</sup> Neil R. Foster,<sup>1,5</sup> Jian-Feng Chen<sup>1,2</sup>

<sup>1</sup> State Key Laboratory of Organic-Inorganic Composites, Beijing University of Chemical  
Technology, Beijing 100029, China

<sup>2</sup> Research Centre of the Ministry of Education for High Gravity Engineering and Technology,  
Beijing University of Chemical Technology, Beijing 100029, China

<sup>3</sup> Jiangsu Key Laboratory of Oral Diseases, Nanjing Medical University, Nanjing, Jiangsu 210029,  
China

<sup>4</sup> Centre for Optical and Electromagnetic Research, South China Academy of Advanced  
Optoelectronics, South China Normal University, Guangzhou 510006, China

<sup>5</sup> Department of Chemical Engineering, Curtin University, Perth, WA 6845, Australia

\* Corresponding authors: Dan Wang (Tel: +86-10-64449453; E-mail:  
[wangdan@mail.buct.edu.cn](mailto:wangdan@mail.buct.edu.cn)) and Yuan Pu (Tel: +86-10-64421905; E-mail:  
[puyuan@mail.buct.edu.cn](mailto:puyuan@mail.buct.edu.cn))

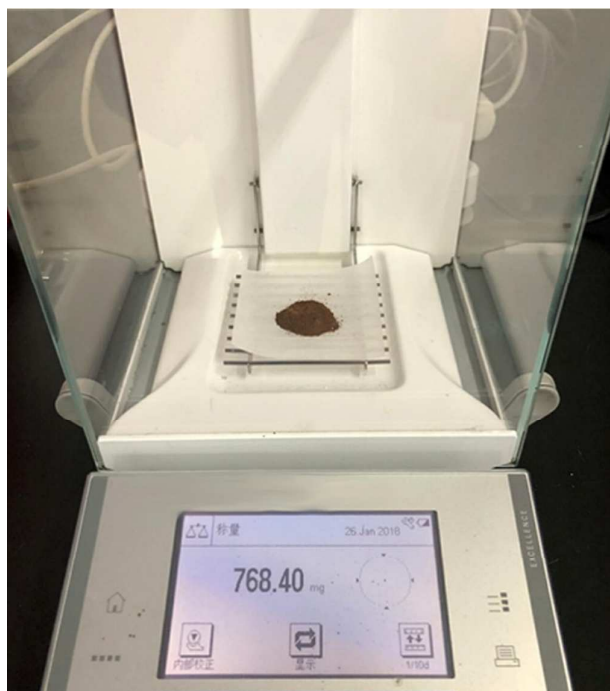

**Figure S1.** The product of the preparation of FCDs in one batch reaction.

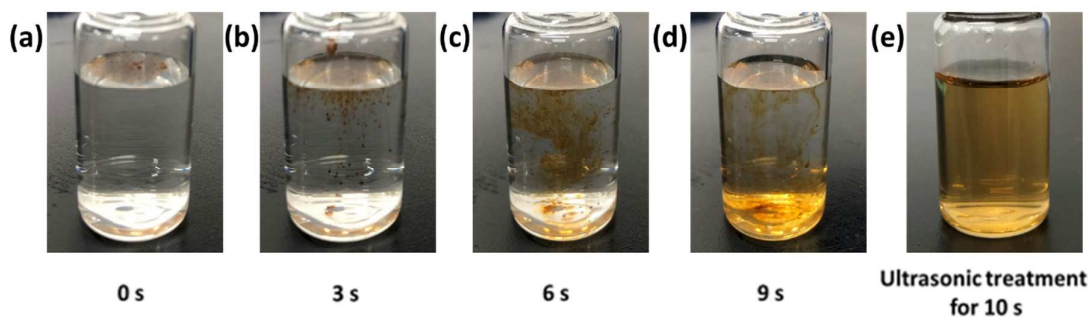

**Figure S2.** The photograph of the water solubility test of the FCDs. It shows the dissolution process of adding the FCDs to the water solution without any treatment (a-d) and with the ultrasonic treatment for 10s (e)

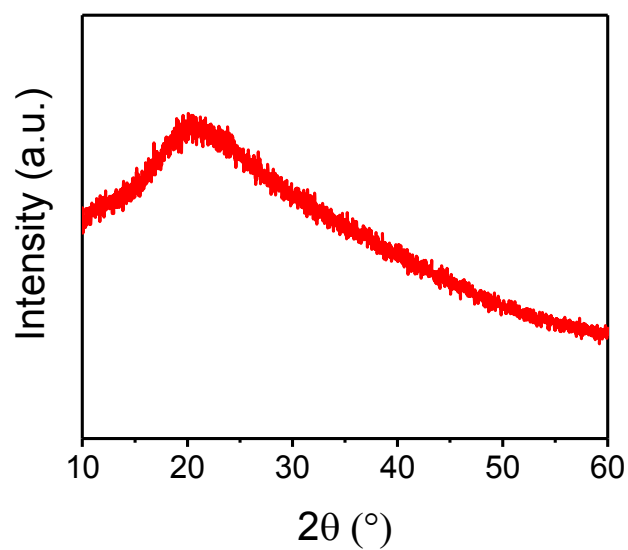

**Figure S3.** XRD pattern of the FCDs

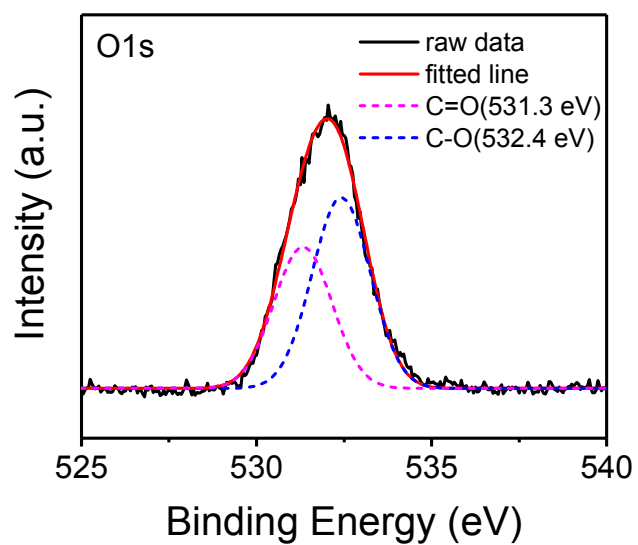

**Figure S4.** High-resolution XPS O1s spectra of the FCDs

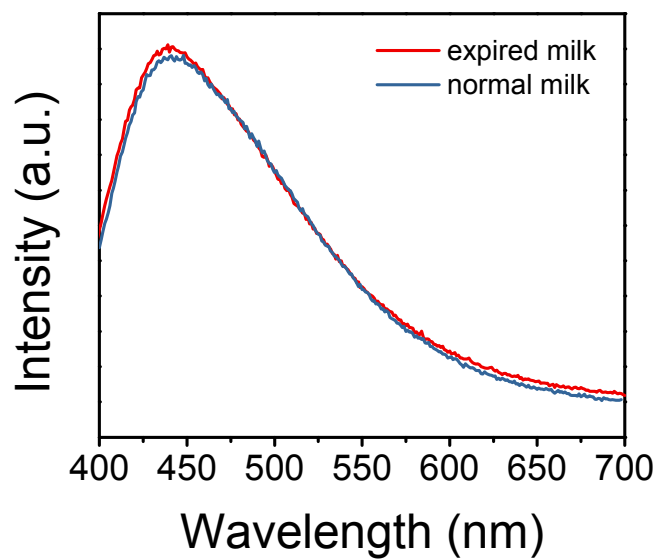

**Figure S5.** Fluorescent spectra of the FCDs obtained by normal milk and expired milk

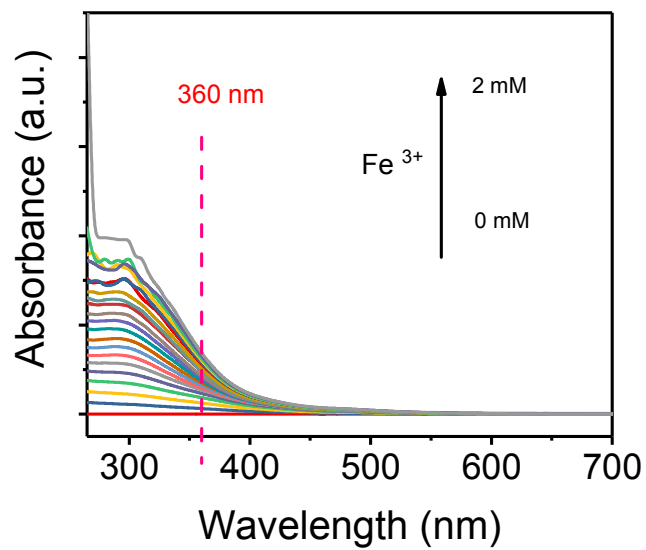

**Figure S6.** UV-visible absorption spectra with different concentrations of Fe<sup>3+</sup>

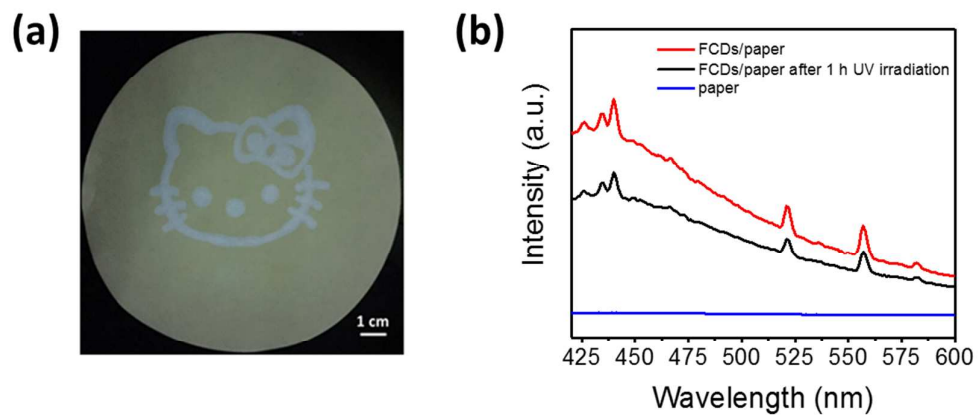

**Figure S7.** (a) Fluorescence photograph and (b) fluorescence emission spectra of FCDs patterns after continuous irradiation under the UV lamp (365 nm) for 1 h.

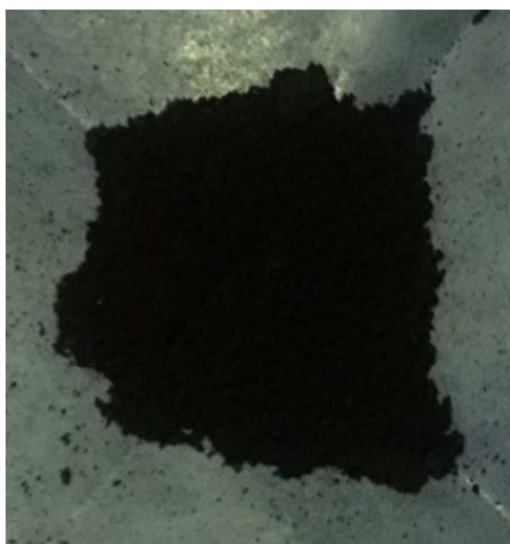

**Figure S8.** The photograph of FCDs powders under a 365 nm UV lamp excitation.

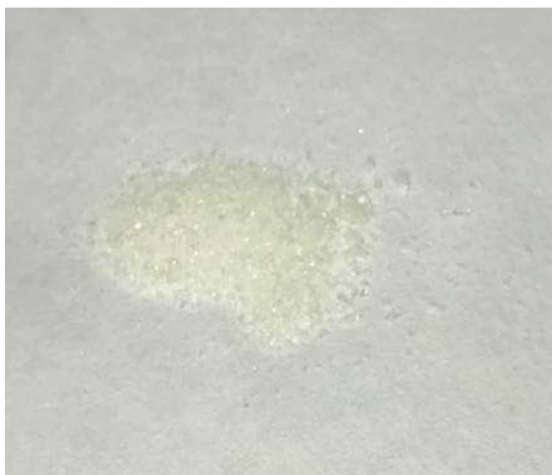

**Figure S9.** The photograph of hydrolysis product of KH-792.

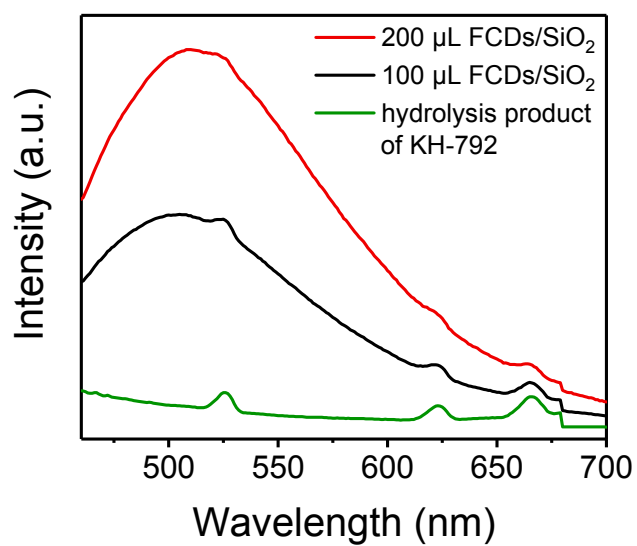

**Figure S10.** Fluorescence emission spectra of FCDs/SiO<sub>2</sub> nano composite powders with different concentrations of FCDs ( $\lambda_{\text{ex}} = 410 \text{ nm}$ ).
